# Supplementary material for: Analysis of the resistance level and target site resistance mechanisms of Echinochloa crus-galli to penoxsulam from Hubei Province, China
Source: PeerJ. 2025 Sep 8;13:e19973. doi: 10.7717/peerj.19973 (PMC12424613; doi:10.7717/peerj.19973)
Supplement: Supplemental Information 1 [file peerj-13-19973-s001.xlsx]

## Sheet: Sheet1
Original OD530 of different concentration of Acetoin
	OD530
Acetoin（umol/L）	1	2	3	AVE	STD
0	0.154	0.162	0.156	0.157333	0.00339935
17.2414	0.283	0.282	0.281	0.282	0.000816497
34.4828	0.401	0.399	0.389	0.396333	0.00524934
51.7241	0.518	0.519	0.495	0.510667	0.0110855
68.9655	0.641	0.635	0.628	0.634667	0.00531246
86.2069	0.749	0.759	0.739	0.749	0.00816497
103.448	0.88	0.872	0.846	0.866	0.0145144
120.69	1.014	0.973	0.965	0.984	0.0214631
Original OD530						Equivalent to Acetoin					Inhibition rate
18-ETF	OD530					18-ETF	Acetoin（umol/L）				18-ETF	Inhibition Rate（%）
Penoxsulam（umol/L）	1	2	3			Penoxsulam（umol/L）	1	2	3		Penoxsulam（umol/L）	1	2	3
0	0.399	0.397	0.394			0	35.0735	34.7794	34.3382		0	100	100	100
0.01	0.381	0.385	0.383			0.01	32.4265	33.0147	32.7206		0.01	92.4528	94.926	95.2891
0.1	0.378	0.382	0.379			0.1	31.9853	32.5735	32.1324		0.1	91.195	93.6575	93.576
1	0.362	0.357	0.36			1	29.6324	28.8971	29.3382		1	84.4864	83.0867	85.439
10	0.335	0.329	0.332			10	25.6618	24.7794	25.2206		10	73.1656	71.2474	73.4475
100	0.293	0.297	0.3			100	19.4853	20.0735	20.5147		100	55.5556	57.7167	59.743
1000	0.264	0.262	0.268			1000	15.2206	14.9265	15.8088		1000	43.3962	42.9175	46.0385
18-WMJ	OD530					18-WMJ	Acetoin（umol/L）				18-WMJ	Inhibition Rate（%）
Penoxsulam（umol/L）	1	2	3			Penoxsulam（umol/L）	1	2	3		Penoxsulam（umol/L）	1	2	3
0	0.361	0.363	0.37			0	29.4853	29.7794	30.8088		0	100	100	100
0.01	0.358	0.355	0.357			0.01	29.0441	28.6029	28.8971		0.01	98.5037	96.0494	93.7947
0.1	0.323	0.328	0.339			0.1	23.8971	24.6324	26.25		0.1	81.0474	82.716	85.2029
1	0.311	0.309	0.305			1	22.1324	21.8382	21.25		1	75.0623	73.3333	68.9737
10	0.279	0.274	0.276			10	17.4265	16.6912	16.9853		10	59.1022	56.0494	55.1313
100	0.238	0.242	0.24			100	11.3971	11.9853	11.6912		100	38.6534	40.2469	37.9475
1000	0.215	0.223	0.218			1000	8.01471	9.19118	8.45588		1000	27.182	30.8642	27.4463
18-WJJ-Ec	OD530					18-WJJ-Ec	Acetoin（umol/L）				18-WJJ-Ec	Inhibition Rate（%）
Penoxsulam（umol/L）	1	2	3			Penoxsulam（umol/L）	1	2	3		Penoxsulam（umol/L）	1	2	3
0	0.388	0.38	0.383			0	33.4559	32.2794	32.7206		0	100	100	100
0.01	0.376	0.379	0.38			0.01	31.6912	32.1324	32.2794		0.01	94.7253	99.5444	98.6517
0.1	0.372	0.367	0.369			0.1	31.1029	30.3676	30.6618		0.1	92.967	94.0774	93.7079
1	0.363	0.358	0.362			1	29.7794	29.0441	29.6324		1	89.011	89.9772	90.5618
10	0.304	0.306	0.298			10	21.1029	21.3971	20.2206		10	63.0769	66.287	61.7978
100	0.257	0.261	0.259			100	14.1912	14.7794	14.4853		100	42.4176	45.7859	44.2697
1000	0.231	0.235	0.238			1000	10.3676	10.9559	11.3971		1000	30.989	33.9408	34.8315
18-NJ	OD530					18-NJ	Acetoin（umol/L）				18-NJ	Inhibition Rate（%）
Penoxsulam（umol/L）	1	2	3			Penoxsulam（umol/L）	1	2	3		Penoxsulam（umol/L）	1	2	3
0	0.295	0.299	0.297			0	19.7794	20.3676	20.0735		0	100	100	100
0.01	0.281	0.29	0.285			0.01	17.7206	19.0441	18.3088		0.01	89.5911	93.5018	91.2088
0.1	0.275	0.279	0.273			0.1	16.8382	17.4265	16.5441		0.1	85.1301	85.5596	82.4176
1	0.245	0.243	0.242			1	12.4265	12.1324	11.9853		1	62.8253	59.5668	59.707
10	0.227	0.23	0.221			10	9.77941	10.2206	8.89706		10	49.4424	50.1805	44.3223
100	0.218	0.212	0.21			100	8.45588	7.57353	7.27941		100	42.7509	37.1841	36.2637
1000	0.195	0.201	0.197			1000	5.07353	5.95588	5.36765		1000	25.6506	29.2419	26.7399
