# Supplementary material for: Analysis of the resistance level and target site resistance mechanisms of Echinochloa crus-galli to penoxsulam from Hubei Province, China
Source: PeerJ. 2025 Sep 8;13:e19973. doi: 10.7717/peerj.19973 (PMC12424613; doi:10.7717/peerj.19973)
Supplement: Supplemental Information 2 [file peerj-13-19973-s002.xlsx]

## Sheet: Sheet1
			Ct value					Ct value
ALS	0D	ETF	18.75		Actin	0D	ETF	17.9
ALS	0D	ETF	18.76		Actin	0D	ETF	17.93
ALS	0D	ETF	18.84		Actin	0D	ETF	17.94
ALS	1D	ETF	17.14		Actin	1D	ETF	16.92
ALS	1D	ETF	17.02		Actin	1D	ETF	16.88
ALS	1D	ETF	17.07		Actin	1D	ETF	16.93
ALS	3D	ETF	16.81		Actin	3D	ETF	18.12
ALS	3D	ETF	16.84		Actin	3D	ETF	18.16
ALS	3D	ETF	16.83		Actin	3D	ETF	18.16
ALS	5D	ETF	17.16		Actin	5D	ETF	17.25
ALS	5D	ETF	17.09		Actin	5D	ETF	17.25
ALS	5D	ETF	17.09		Actin	5D	ETF	17.18
ALS	7D	ETF	17.47		Actin	7D	ETF	17.59
ALS	7D	ETF	17.42		Actin	7D	ETF	17.59
ALS	7D	ETF	17.42		Actin	7D	ETF	17.62
ALS	0D	WMJ	19.83		Actin	0D	WMJ	18.6
ALS	0D	WMJ	19.82		Actin	0D	WMJ	18.57
ALS	0D	WMJ	19.79		Actin	0D	WMJ	18.57
ALS	1D	WMJ	18.05		Actin	1D	WMJ	19.15
ALS	1D	WMJ	18.1		Actin	1D	WMJ	19.19
ALS	1D	WMJ	18.03		Actin	1D	WMJ	19.18
ALS	3D	WMJ	19.55		Actin	3D	WMJ	18.79
ALS	3D	WMJ	19.48		Actin	3D	WMJ	18.86
ALS	3D	WMJ	19.58		Actin	3D	WMJ	18.8
ALS	5D	WMJ	19.97		Actin	5D	WMJ	18.96
ALS	5D	WMJ	19.94		Actin	5D	WMJ	19.03
ALS	5D	WMJ	20.05		Actin	5D	WMJ	19.01
ALS	7D	WMJ	19.88		Actin	7D	WMJ	18.61
ALS	7D	WMJ	19.94		Actin	7D	WMJ	18.6
ALS	7D	WMJ	19.85		Actin	7D	WMJ	18.64
ALS	0D	WJJ	20.47		Actin	0D	WJJ	19.2
ALS	0D	WJJ	20.3		Actin	0D	WJJ	19.29
ALS	0D	WJJ	20.41		Actin	0D	WJJ	19.46
ALS	1D	WJJ	18.07		Actin	1D	WJJ	19.34
ALS	1D	WJJ	18.02		Actin	1D	WJJ	19.42
ALS	1D	WJJ	18.15		Actin	1D	WJJ	19.65
ALS	3D	WJJ	18.75		Actin	3D	WJJ	17.98
ALS	3D	WJJ	18.5		Actin	3D	WJJ	18.04
ALS	3D	WJJ	18.65		Actin	3D	WJJ	18.11
ALS	5D	WJJ	19.45		Actin	5D	WJJ	18.44
ALS	5D	WJJ	19.31		Actin	5D	WJJ	18.36
ALS	5D	WJJ	19.7		Actin	5D	WJJ	18.42
ALS	7D	WJJ	20.86		Actin	7D	WJJ	19.32
ALS	7D	WJJ	20.72		Actin	7D	WJJ	19.26
ALS	7D	WJJ	20.82		Actin	7D	WJJ	19.34
ALS	0D	NJ	18.81		Actin	0D	NJ	17.33
ALS	0D	NJ	18.72		Actin	0D	NJ	17.37
ALS	0D	NJ	18.94		Actin	0D	NJ	17.35
ALS	1D	NJ	17.51		Actin	1D	NJ	17.84
ALS	1D	NJ	17.51		Actin	1D	NJ	17.86
ALS	1D	NJ	17.52		Actin	1D	NJ	17.9
ALS	3D	NJ	16.72		Actin	3D	NJ	17.15
ALS	3D	NJ	16.67		Actin	3D	NJ	17.22
ALS	3D	NJ	16.75		Actin	3D	NJ	17.26
ALS	5D	NJ	17.15		Actin	5D	NJ	17.62
ALS	5D	NJ	17.16		Actin	5D	NJ	17.65
ALS	5D	NJ	17.19		Actin	5D	NJ	17.72
ALS	7D	NJ	17.15		Actin	7D	NJ	17.29
ALS	7D	NJ	17.16		Actin	7D	NJ	17.23
ALS	7D	NJ	17.21		Actin	7D	NJ	17.41
