# Supplementary material for: Analysis of the resistance level and target site resistance mechanisms of Echinochloa crus-galli to penoxsulam from Hubei Province, China
Source: PeerJ. 2025 Sep 8;13:e19973. doi: 10.7717/peerj.19973 (PMC12424613; doi:10.7717/peerj.19973)
Supplement: Supplemental Information 4 [file peerj-13-19973-s004.xlsx]

## Sheet: Sheet1
	Fresh Weight(g)					Fresh Weight Inhibition Rate(%)
18-ETF
DOSE	1	2	3		DOSE	1	2	3
0	51.96	47.73	49.36		0	100	100	100
64	42.42	40.42	39.87		64	81.6397	84.6847	80.7739
128	39.85	38.43	38.5		128	76.6936	80.5154	77.9984
256	33.74	33.67	31.32		256	64.9346	70.5426	63.4522
512	29.57	27.42	24.74		512	56.9092	57.4481	50.1216
1024	10.59	8.85	9.1		1024	20.3811	18.5418	18.436
2048	8.71	6.44	5.93		2048	16.7629	13.4926	12.0138
18-DDX
DOSE	1	2	3		DOSE	1	2	3
CK	21.01	20.9	22.78		0	100	100	100
2	18.75	19.7	20.11		32	89.2432	94.2584	88.2792
4	16.34	15.69	16.93		64	77.7725	75.0718	74.3196
8	10.67	10.06	12.31		128	50.7853	48.134	54.0386
16	6.17	5.33	7.43		256	29.367	25.5024	32.6163
32	1.45	2.3	1.26		512	6.90148	11.0048	5.53117
18-WLH
DOSE	1	2	3		DOSE	1	2	3
0	25.27	24.66	26.49	15	0	100	100	100
8	21.59	22.46	24.27		8	85.4373	91.0787	91.6195
16	20.54	21.59	21.34		16	81.2822	87.5507	80.5587
32	18.33	16.86	19.37		32	72.5366	68.3698	73.1219
64	11.68	12.83	14.12		64	46.2208	52.0276	53.3031
128	9.08	8.46	10.91		128	35.9319	34.3066	41.1854
18-WMJ
DOSE	1	2	3		DOSE	1	2	3
0	23.59	25.12	22.87		0	100	100	100
16	16.56	15.62	17.81		16	70.1992	62.1815	77.8749
32	12.26	12.85	13.53		32	51.9712	51.1545	59.1605
64	8.56	8.64	7.35		64	36.2866	34.3949	32.1382
128	6.27	5.63	6.3		128	26.5791	22.4124	27.547
256	5.49	6.1	5.03		256	23.2726	24.2834	21.9939
18-WJJ
DOSE	1	2	3		DOSE	1	2	3
0	22.71	26.85	24.06		0	100	100	100
16	11.35	12.64	10.81		16	49.978	47.0764	44.9293
32	7.57	6.96	8.15		32	33.3333	25.9218	33.8736
64	3.04	4.37	3.59		64	13.3862	16.2756	14.921
128	1.16	2.03	1.37		128	5.10788	7.56052	5.6941
256	0.65	0.92	0.72		256	2.86218	3.42644	2.99252
18-QZW
DOSE	1	2	3		DOSE	1	2	3
0	26.22	24.43	26.39		0	100	100	100
4	24.12	23.23	23.29		4	91.9908	95.088	88.2531
8	18.19	16.15	16.01		8	69.3745	66.1072	60.6669
16	8.86	8.57	7.56		16	33.791	35.0798	28.6472
32	1.64	1.47	2.77		32	6.25477	6.01719	10.4964
64	0.42	0.38	0.61		64	1.60183	1.55546	2.31148
18-JPX
DOSE	1	2	3		DOSE	1	2	3
0	22.45	24.22	21.09		0	100	100	100
8	14.21	15.93	12.34		8	63.2962	65.7721	58.5111
16	9.24	7.75	8.49		16	41.1581	31.9983	40.256
32	7.49	5.82	6.22		32	33.363	24.0297	29.4927
64	4.56	4.32	3.75		64	20.3118	17.8365	17.7809
128	1.71	2.23	1.9		128	7.61693	9.20727	9.00901
18-JJCY
DOSE	1	2	3		DOSE	1	2	3
0	25.7	24.14	22.76		0	100	100	100
4	22.34	20.38	19.5		4	86.9261	84.4242	85.6766
8	11.24	12.11	11.96		8	43.7354	50.1657	52.5483
16	8.46	7.9	7.95		16	32.9183	32.7258	34.9297
32	2.25	1.94	1.52		32	8.75486	8.03645	6.67838
64	0.44	0	0		64	1.71206	0	0
18-YTW
DOSE	1	2	3		DOSE	1	2	3
0	23.51	25.69	23.89		0	100	100	100
16	10.62	8.59	9.35		16	45.1723	33.4371	39.1377
32	7.06	6.58	6.04		32	30.0298	25.6131	25.2825
64	4.12	3.67	3.9		64	17.5245	14.2857	16.3248
128	3.04	2.85	3.26		128	12.9307	11.0938	13.6459
256	2.18	2.54	3.17		256	9.27265	9.88712	13.2692
18-HDD
DOSE	1	2	3		DOSE	1	2	3
0	21.88	19.05	22.05		0	100	100	100
4	15.23	14.6	16.73		4	69.6069	76.6404	75.873
8	9.55	8.68	9.75		8	43.6472	45.5643	44.2177
16	3.38	3.7	4.18		16	15.4479	19.4226	18.9569
32	1.73	1.15	2.18		32	7.90676	6.03675	9.88662
64	0.43	0.83	0.48		64	1.96527	4.35696	2.17687
18-XYCZ
DOSE	1	2	3		DOSE	1	2	3
0	24.12	27.22	25.4		0	100	100	100
4	16.78	18.32	17.54		4	69.5688	67.3035	69.0551
8	6.51	8.89	7.77		8	26.99	32.6598	30.5906
16	4.27	3.32	4.15		16	17.7032	12.1969	16.3386
32	1.78	2.31	2.07		32	7.37977	8.48641	8.14961
64	1.19	1.43	1.53		64	4.93367	5.25349	6.02362
18-JWZ
DOSE	1	2	3		DOSE	1	2	3
0	24.78	27.51	26.52		0	100	100	100
1	22.41	26.08	25.35		1	90.4358	94.8019	95.5882
2	23.65	24.21	20.82		2	95.4399	88.0044	78.5068
4	14.26	13.9	17.63		4	57.5464	50.5271	66.4781
8	8.93	10.31	9.52		8	36.0371	37.4773	35.8974
16	3.45	5.14	4.03		16	13.9225	18.6841	15.1961
18-JZWD
DOSE	1	2	3		DOSE	1	2	3
0	25.87	26.31	23.61		0	100	100	100
4	13.88	12.05	12.97		4	53.6529	45.8001	54.9343
8	6.55	5.05	5.72		8	25.3189	19.1942	24.227
16	2.41	3.02	2.21		16	9.31581	11.4785	9.36044
32	0.88	0.63	0.84		32	3.40162	2.39453	3.55781
64	0.19	0	0.56		64	0.734441	0	2.37188
18-XYXS
DOSE	1	2	3		DOSE	1	2	3
0	24.36	23.25	25.68		0	100	100	100
4	10.39	10.85	11.47		4	42.6519	46.6667	44.6651
8	4.61	3.79	5.91		8	18.9245	16.3011	23.014
16	1.76	1.47	2.01		16	7.22496	6.32258	7.8271
32	0.76	0.44	0.62		32	3.11987	1.89247	2.41433
64	0.39	0.29	0		64	1.60099	1.24731	0
18-JJXJ
DOSE	1	2	3		DOSE	1	2	3
0	26.93	24.36	25.71		0	100	100	100
1	24.56	21.77	23.54		1	91.1994	89.3678	91.5597
2	18.55	18.63	17.64		2	68.8823	76.4778	68.6114
4	8.8	9.3	8.43		4	32.6773	38.1773	32.7888
8	3.12	2.59	2.27		8	11.5856	10.6322	8.82925
16	1.86	1.41	2.08		16	6.9068	5.78818	8.09024
18-NJ
DOSE	1	2	3	4	DOSE	1	2	3	4
0	38.24	40.62	35.97	37.88	0	100	100	100	100
0.25	24.21	27.28	23.02	26.92	0.25	63.3107	67.159	63.9978	71.0665
0.5	15.93	20.98	14.04	18.69	0.5	41.6579	51.6494	39.0325	49.34
1	13.96	10.35	11.49	13.17	1	36.5063	25.4801	31.9433	34.7677
2	5.71	9.12	4.89	7.2	2	14.932	22.452	13.5947	19.0074
4	2.33	3.03	1.92	4.04	4	6.0931	7.45938	5.33778	10.6653
8	0.84	0.39	0.19	0.95	8	2.19665	0.960118	0.528218	2.50792
16	0	0.15	0	0	16	0	0.369276	0	0
32	0	0	0	0	32	0	0	0	0
